# Supplementary material for: Triple-shelled Mn2O3hollow nanocubes: force-induced synthesis and excellent performance as the anode in lithium-ion batteries
Source: Royal Society of Chemistry journal article supplement (doi:10.1039/c4ta02666g), 2014-07-11
Supplement: c4ta02666g1.pdf [file c4ta02666g1.pdf]

## Electronic Supplementary Information

### Treble-shelled $\text{Mn}_2\text{O}_3$ Hollow Nanocubes: Force-induced Synthesis and Excellent Performance as Anode of Lithium Ion Battery

H. B. Lin, H. B. Rong, W. Z. Huang, Y. H. Liao, L. D. Xing, M. Q. Xu, X. P. Li\*, W. S. Li\*

*School of Chemistry and Environment, Key Laboratory of Electrochemical Technology on Energy Storage and Power Generation of Guangdong Higher Education Institutes, Engineering Research Center of Materials and Technology for Electrochemical Energy Storage (Ministry of Education), South China Normal University, Guangzhou 510006, China*  
Fax: +8620 39310256; Tel: +8620 39310256; E-mail: [liwsh@scnu.edu.cn](mailto:liwsh@scnu.edu.cn)

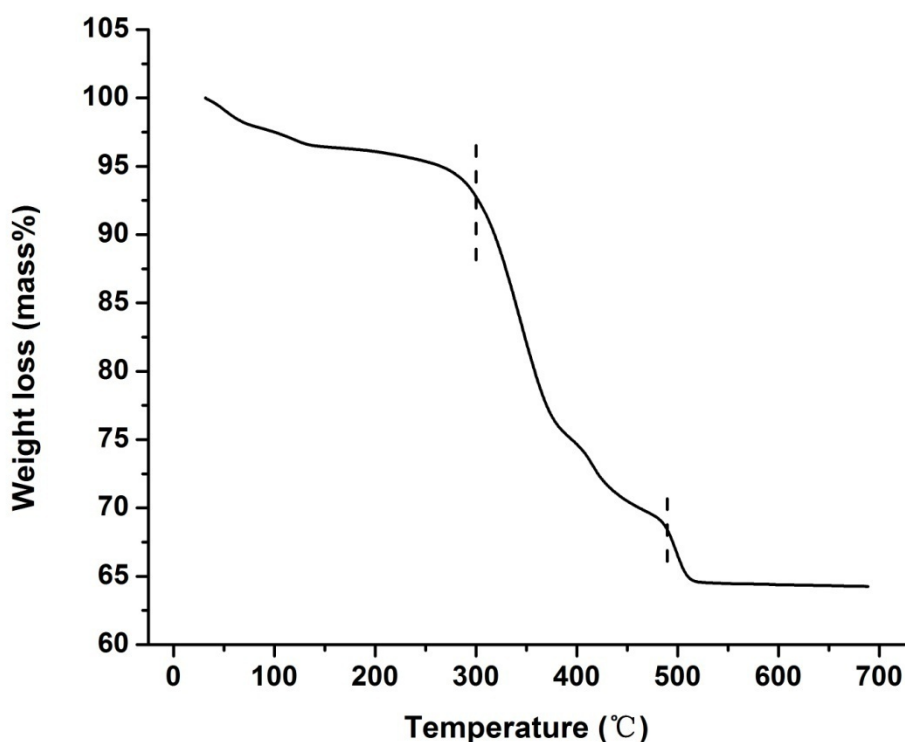

Fig. S1. Thermogravimetric curve of  $\text{MnCO}_3$  nanocubes.

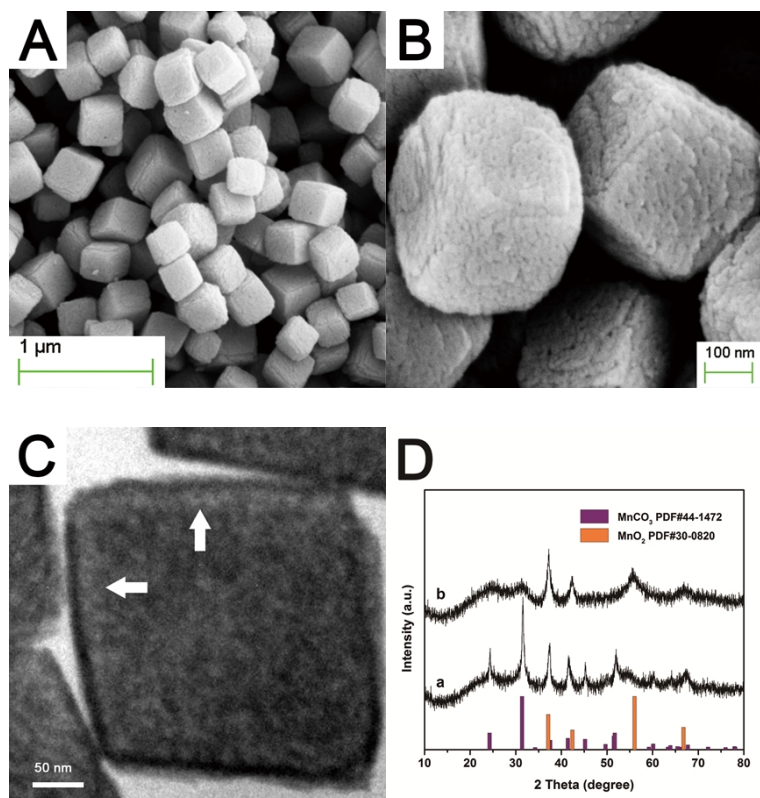

**Fig. S2.** FESEM images (A, B), TEM image (C) and XRD pattern (D) of the  $\text{MnCO}_3$  nanocubes after an annealing treatment at  $300\text{ }^\circ\text{C}$  for 1 h with a ramping rate of  $1\text{ }^\circ\text{C min}^{-1}$ (a) and at  $400\text{ }^\circ\text{C}$  for 1 h (b).

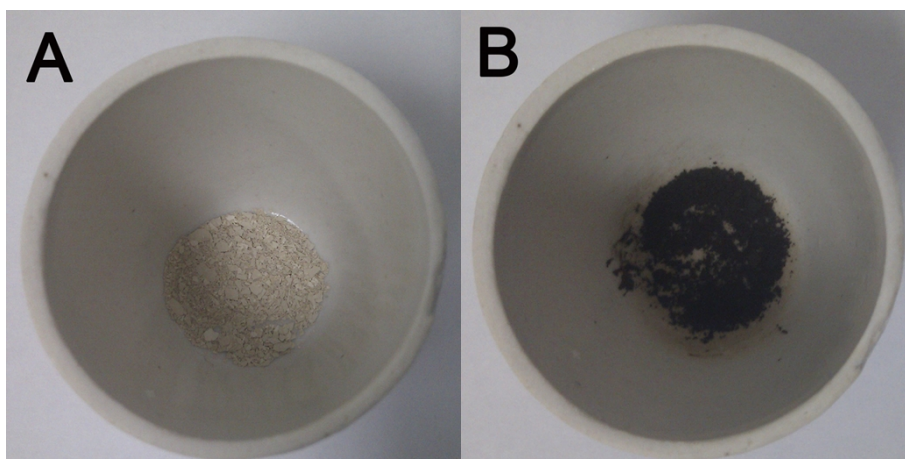

**Fig. S3.** Photos of  $\text{MnCO}_3$  nanocubes before (A) and after the first heat treatment (B).

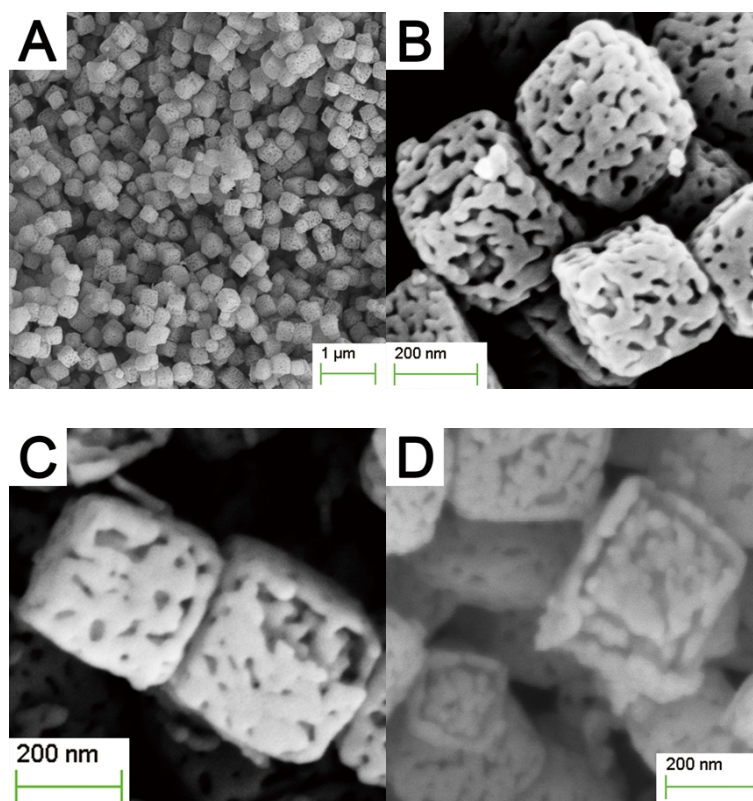

**Fig. S4.** FESEM images of treble-shelled  $\text{Mn}_2\text{O}_3$  nanocubes.
